# Supplementary material for: Synthesis of novel conjugates of a saccharide, amino acids, nucleobase and the evaluation of their cell compatibility
Source: publisher site journal article supplement (doi:10.3762/bjoc.10.250), 2014-10-16
Supplement: Additional file 1 [file 1860-5397-10-250-S1.pdf]

## Supporting Information

for

# Synthesis of novel conjugates of a saccharide, amino acids, nucleobase and the evaluation of their cell compatibility

Dan Yuan<sup>1</sup>, Xuewen Du<sup>1</sup>, Junfeng Shi<sup>1</sup>, Ning zhou<sup>1</sup>, Abdulgader Ahmed Baoum,<sup>2</sup> and Bing Xu\*<sup>1</sup>

Address: <sup>1</sup>Department of Chemistry, Brandeis University, 415 South Street, MS015, Waltham, MA 02453, USA. <sup>2</sup>Department of Chemistry, King Abdulaziz University, Jeddah, Saudi Arabia.

Email: Bing Xu - bxu@brandeis.edu

\* Corresponding author

## General section, experimental section, TEM images of solutions of 1–8.

### 1. General

#### 1.1 Materials

All of the solvents and chemical reagents were used as received from the commercial sources without further purification unless otherwise noted. Amino acids and HBTU were purchased from GL Biochem (Shanghai) Ltd. D-glucuronic acid was

purchased from Alfa-Aesar. Thymine, Adenine, *N*-hydroxysuccinimide (NHS), *N,N*-diisopropylcarbodiimide (DIC), Di-*tert*-butyl dicarbonate (Boc<sub>2</sub>O) were purchased from Acros Organics. 2-Bromoethylamine hydrobromide was purchased from TCI America. Other materials and solvents were purchased from Fisher Scientific. The HeLa cell line (CCL2) was purchased from American Type Culture Collection. All of the media were purchased from Invitrogen.

### 1.2 Spectrometers:

<sup>1</sup>H NMR was run on Varian Unity Inova 400. LC-MS was taken on Waters Acquity ultra Performance LC with Waters MICROMASS detector. TEM images were collected on Morgagni 268 transmission electron microscope. MTT assay for cell viability test was obtained on DTX880 Multimode Detector.

## 2. Experimental

Compounds **10-19** were prepared according to literatures [1-5].

**Synthesis of 10:** 2-Bromoethylamine hydrobromide (2.0 g, 9.8 mmol) was dissolved in methanol (40 mL) and to it di-*tert*-butyl dicarbonate (4.28g, 19.6 mmol) along with triethylamine (1.4 mL, 10 mmol) was added. The mixture solution was stirred at 60 °C for 1 h then at room temperature for 14 h. The resulting solution was evaporated under reduced pressure, and dichloromethane (150 ml) was added, then washed with 1M HCl (4 x 50 mL) and saturated aqueous NaCl (3 x 50 mL). The organic phase was dried over Na<sub>2</sub>SO<sub>4</sub>, filtered, and concentrated under reduced pressure, and oil was

obtained (1.88g, 85.7 %).  $^1\text{H}$  NMR (400 MHz,  $\text{CDCl}_3$ )  $\delta$ : 4.94 (br. s, 1H, NH), 3.53 (t, 2H,  $\text{CH}_2\text{NH}$ ), 3.46 (t, 2H,  $\text{BrCH}_2$ ), 1.45 (s, 9H, Boc).

**Synthesis of 11:** Compound **10** (1.88 g, 8.4 mmol) was added to DMF solution (50 mL) of adenine (1.14 g, 8.4 mmol) with  $\text{K}_2\text{CO}_3$  (2.32 g, 16.8 mmol), and the solution was stirred at room temperature for 24 h. After removing the solvent by rotary evaporation, compound thus obtained was purified by flash chromatography on silica gel. The solvent was removed under reduced pressure to obtain a white powder (1.6 g, 68.5 %).  $^1\text{H}$  NMR (400 MHz,  $\text{DMSO}-d_6$ )  $\delta$ : 8.12 (s, 1H, adenine H), 7.99 (s, 1H, adenine H), 7.14 (s, 2H,  $\text{NH}_2$ ), 6.96 (t, 1H, NH), 4.17 (t, 2H,  $\text{NCH}_2$ ), 3.35 (m, 2H,  $\text{CH}_2\text{NH}$ ), 1.31 (s, 9H, Boc).

**Synthesis of 12:** Compound **11** (1.6 g, 5.75 mmol) was dissolved in 10 mL TFA/ $\text{H}_2\text{O}$  (95: 5) and stirred at room temperature for 1 h. The solvent was removed by air-blowing, and diethyl ether was added. The precipitate formed was filtered off under reduced pressure to get compound **12** (0.84 g, 82.1%).  $^1\text{H}$  NMR (400 MHz,  $\text{DMSO}-d_6$ )  $\delta$ : 8.33 (s, 1H, adenine H), 8.26 (s, 1H, adenine H), 7.92 (s, 2H,  $\text{NH}_2$ ), 4.43 (t, 2H,  $\text{NCH}_2$ ), 3.34 (m, 2H,  $\text{CH}_2\text{NH}_2$ ).

**Synthesis of 14:** To a well-stirred solution of potassium phthalimide **13** (5.00 g, 27.0 mmol) in DMF (10 ml) was added 1, 2-dibromoethane (6.91 ml, 81.0 mmol) and the reaction mixture was stirred 15 h under nitrogen. The solvent was removed under

reduced pressure and the residue was dissolved in ethyl acetate (200 ml) and extracted with water (2 × 100 ml). The organic layer was washed successively with saturated aqueous NH<sub>4</sub>Cl and NaCl, dried over Na<sub>2</sub>SO<sub>4</sub>, filtered, and concentrated under reduced pressure to afford **14** (6.15 g, 89.6 %) as a white crystalline solid. <sup>1</sup>H NMR (400 MHz, CDCl<sub>3</sub>) δ: 7.85 (m, 2H, ArH), 7.72 (m, 2H, ArH), 4.10 (t, 2H, NCH<sub>2</sub>), 3.58 (t, 2H, CH<sub>2</sub>Br).

**Synthesis of 15:** Thymine (2.50 g, 19.8 mmol) was dissolved in DMSO (50 ml) and then treated with K<sub>2</sub>CO<sub>3</sub> (2.76 g, 20.0 mmol) and **14** (2.60 g, 10.3 mmol) for 12 h at room temperature. After the precipitate had been filtered off, the filtrate was concentrated under reduced pressure to produce a viscous yellowish liquid. The liquid was diluted with dichloromethane (50 ml) and extracted with water (25 ml). The water layer was extracted further with dichloromethane (2 × 25 ml). The combined organic layers were concentrated under reduced pressure and the resulting oil was dissolved in a small volume of dichloromethane and induced to crystallize with hexane to obtain **15** (3.12 g, 52.7 %) as a white powder. <sup>1</sup>H NMR (400 MHz, DMSO-*d*<sub>6</sub>) δ: 7.83-7.78 (m, 4H, ArH), 7.47 (s, 1H, thymine 6-H), 3.96 (t, 2H, NCH<sub>2</sub>CH<sub>2</sub>N), 3.80 (t, 2H, NCH<sub>2</sub>CH<sub>2</sub>N), 1.61 (s, 3H, CH<sub>3</sub>).

**Synthesis of 16:** Compound **15** (1.50 g, 5.0 mmol) was dissolved in n-butylamine/methanol (1: 4, 30 mL) and the solution was stirred under reflux for 2 days. The reaction mixture was concentrated under reduced pressure and then

dissolved in 0.5 M HCl (75 ml). After extraction with diethyl ether (75 ml), the aqueous phase was evaporated under reduced pressure. The residue was dissolved in benzene/methanol (1: 1, 32 mL) to form an azeotropic mixture, which was evaporated under reduced pressure. A solid mass was formed, which was recrystallized from a mixture of MeOH/diethylether/chloroform (1:1:1) to obtain **16** (600 mg, 70.9 %) as a white powder.  $^1\text{H}$  NMR (400 MHz, DMSO- $d_6$ )  $\delta$ : 7.40 (s, 1H, thymine 6-H), 3.87 (t, 2H,  $\text{NCH}_2$ ), 3.07 (br. s, 2H,  $\text{CH}_2\text{NH}_2$ ), 1.71 (s, 3H,  $\text{CH}_3$ ).

**Synthesis of 18:** To a well stirred, 0 °C solution of **17** (1 g, 5.15 mmol) in acetic anhydride (15 mL) was added slowly iodine (70 mg, 0.28 mmol). The red solution was stirred for 2 h on ice and for further 3 h at room temperature. Acetic anhydride was mostly removed under reduced pressure and the remaining mixture was dissolved in dichloromethane (12 mL). The organic layer was then washed with  $\text{Na}_2\text{S}_2\text{O}_3$  (1.0 M, 2 x 16 mL), dried ( $\text{MgSO}_4$ ), filtered, and concentrated to afford **18** as a white powder. The  $\beta$ -anomer can be separated from its  $\alpha$ -anomer (present as minor impurity) by recrystallization from dichloromethane/petro-leum ether (2/3) (1.58 g, 75.9 %).  $^1\text{H}$  NMR (400 MHz,  $\text{CDCl}_3$ )  $\delta$ : 5.76 (d, 1H, H-1), 5.31 (t, 1H, H-4), 5.22 (t, 1H, H-3), 5.05 (t, 1H, H-2), 4.26 (d, 1H, H-5), 2.21 (s, 3H,  $\text{COOCOCH}_3$ ), 2.01, 1.99, 1.98, 1.97 (each s, each 3H, each  $\text{COCH}_3$ ).

**Synthesis of 19:** Compound **18** (1.38 g, 3.42 mmol) was dissolved in water and THF (1: 2, 30 mL) and stirred overnight at room temperature. The solution was

concentrated and the product extracted into dichloromethane (3 x 50 mL), dried over MgSO<sub>4</sub>, and filtered. After evaporation under reduced pressure, a white fluffy material was obtained and identified as **19** (1.14 g, 92.1 %). <sup>1</sup>H NMR (400 MHz, CDCl<sub>3</sub>) δ: 5.76 (d, 1H, H-1), 5.29 (m, 2H, H-3 and H-4 overlapping), 5.11 (t, 1H, H-2), 4.20 (m, 1H, H-5), 3.57 (br. s, 1H, COOH), 2.17, 2.10, 2.02, 2.01 (each s, each 3H, each COCH<sub>3</sub>).

**Synthesis of 20:** compound **20** was obtained by Solid Phase Peptide Synthesis

(SPPS) [6]. All processes were carried out under N<sub>2</sub> environment. <sup>1</sup>H NMR (400 MHz, DMSO-*d*<sub>6</sub>) δ: 8.19 (m, 3H, NH), 8.05 (s, 1H, NH), 7.83 (d, 3H, ArH), 7.77 (m, 3H, ArH), 7.63 (d, 1H, ArH), 7.55 (m, 2H, ArH), 7.47 (m, 3H, ArH), 7.36 (q, 2H, ArH), 7.24 (m, 5H, ArH), 7.14 (q, 2H, ArH), 6.67, 6.42 (each br. s, 2H, NHCNH), 4.58 (m, 1H, CHCH<sub>2</sub>CO), 4.32 (m, 2H, CHCH<sub>2</sub>C), 4.07 (m, 3H, CHCH<sub>2</sub>O and CHCH<sub>2</sub>CH<sub>2</sub> overlapping), 3.89 (t, 1H, CHCH<sub>2</sub>O), 3.75 (d, 2H, NHCH<sub>2</sub>CO), 3.09 (m, 4H, CHCH<sub>2</sub>C), 2.90 (m, 4H, CHCH<sub>2</sub>CO and CCH<sub>2</sub>C overlapping), 2.65 (m, 2H, CH<sub>2</sub>CH<sub>2</sub>NH), 2.47, 2.41, 1.97 (each s, each 3H, each CCH<sub>3</sub>), 1.69 (br. s, 1H, CNH), 1.45 (m, 4H, CCH<sub>2</sub>CH<sub>2</sub>), 1.37, 1.34 (each s, 15H, C(CH<sub>3</sub>)<sub>3</sub> and C(CH<sub>3</sub>)<sub>2</sub>).

**Synthesis of 21:** DIC (536 μL, 3.43 mmol) was added to tetrahydrofuran (20 mL) solution of **20** (1.2g, 0.98 mmol) and NHS (395.4 mg, 3.43 mmol) and stirred at room temperature for 3 h. Then the resulting solution was added dropwise to a well stirred water solution (5 mL) of compound **12** (436 mg, 2.45 mmol) which the pH was adjusted to 8.5 by sodium carbonate. The mixture was stirred overnight at room

temperature. The solvent was evaporated under reduced pressure. The residue was washed by water, filtered, and purified by flash chromatography on silica gel to yield **21** (712 mg, 52.6 %) as a white powder.  $^1\text{H}$  NMR (400 MHz,  $\text{DMSO-}d_6$ )  $\delta$ : 8.21 (m, 3H, *NH*), 8.16 (m, 3H, *NH* and adenine H overlapping) 7.99 (s, 1H, adenine H), 7.83 (m, 3H, ArH), 7.76 (m, 3H, ArH), 7.62 (d, 1H, ArH), 7.55 (m, 2H, ArH), 7.45 (m, 3H, ArH), 7.36 (q, 2H, ArH), 7.21 (m, 7H, ArH), 6.65, 6.42 (each br. s, 2H, *NHCNH*), 4.59 (m, 1H, *CHCH*<sub>2</sub>*CO*), 4.32 (m, 2H, *CHCH*<sub>2</sub>*C*), 4.17 (t, 2H, *NHCH*<sub>2</sub>*CH*<sub>2</sub>*N*), 4.07 (m, 2H, *CHCH*<sub>2</sub>*O* and *CHCH*<sub>2</sub>*CH*<sub>2</sub> overlapping), 3.88 (s, 1H, *CHCH*<sub>2</sub>*O*), 3.74 (s, 2H, *NHCH*<sub>2</sub>*CO*), 3.43 (m, 2H, *NHCH*<sub>2</sub>*CH*<sub>2</sub>*N*), 3.08 (m, 4H, *CHCH*<sub>2</sub>*C*), 2.89 (m, 4H, *CHCH*<sub>2</sub>*CO* and *CCH*<sub>2</sub>*C* overlapping), 2.62 (m, 2H, *CH*<sub>2</sub>*CH*<sub>2</sub>*NH*), 2.46, 2.40, 1.97 (each s, each 3H, each *CCH*<sub>3</sub>), 1.69 (br. s, 1H, *CNH*), 1.44 (m, 4H, *CCH*<sub>2</sub>*CH*<sub>2</sub>), 1.36, 1.34 (each s, 15H, *C(CH*<sub>3</sub>)<sub>3</sub> and *C(CH*<sub>3</sub>)<sub>2</sub>). LCMS (ESI) (*m/z*): C<sub>73</sub>H<sub>84</sub>N<sub>14</sub>O<sub>12</sub>S, calcd 1380.61; found 1379.97 [*M*-1]<sup>-</sup>, 1381.92 [*M*+1]<sup>+</sup>.

**Synthesis of 22:** Compound **21** (557 mg, 0.40 mmol) was treated with 20% piperidine in chloroform for 30 min. The solution was concentrated under reduced pressure and the product **22** (401 mg, 86.5 %) was obtained after purification by flash chromatography on silica gel.  $^1\text{H}$  NMR (400 MHz,  $\text{DMSO-}d_6$ )  $\delta$ : 8.29 (d, 1H, *NH*), 8.14 (m, 5H, *NH* and adenine H overlapping), 8.00 (s, 1H, adenine H), 7.79 (m, 3H, ArH), 7.65 (s, 1H, ArH), 7.44 (m, 2H, ArH), 7.31 (d, 1H, ArH), 7.16 (m, 5H, ArH), 6.75, 6.43 (each br. s, 2H, *NHCNH*), 4.60 (m, 1H, *CHCH*<sub>2</sub>*CO*), 4.51 (m, 1H, *NH*<sub>2</sub>*CHCO*), 4.27 (m, 2H, *CHCH*<sub>2</sub>*C* and *CHCH*<sub>2</sub>*CH*<sub>2</sub> overlapping), 4.17 (t, 2H, *NHCH*<sub>2</sub>*CH*<sub>2</sub>*N*), 3.74 (t, 2H,

NHCH<sub>2</sub>CO), 3.45 (m, 2H, NHCH<sub>2</sub>CH<sub>2</sub>N), 3.03 (m, 4H, CHCH<sub>2</sub>C), 2.88 (m, 4H, CHCH<sub>2</sub>CO and CCH<sub>2</sub>C overlapping), 2.61 (m, 2H, CH<sub>2</sub>CH<sub>2</sub>NH), 2.46, 2.41, 1.98 (each s, each 3H, each CCH<sub>3</sub>), 1.67 (br. s, 1H, CNH), 1.54 (m, 4H, CCH<sub>2</sub>CH<sub>2</sub>), 1.38, 1.35 (each s, 15H, C(CH<sub>3</sub>)<sub>3</sub> and C(CH<sub>3</sub>)<sub>2</sub>).

**Synthesis of 23:** Compound **19** (469 mg, 1.3 mmol) and NHS (298 mg, 2.59 mmol) was dissolved in tetrahydrofuran (15 mL) and then DIC (405  $\mu$ L, 2.59 mmol) was added. The mixture solution was stirred at room temperature for 3 h. Later the above solution was added dropwise to a well stirred water solution (3mL) of compound **22** (300 mg, 0.26 mmol) which the pH was adjusted to 8.5 by sodium carbonate. The mixture was stirred at room temperature for 15 h. The solvent was evaporated under reduced pressure. The residue was washed by water, filtered, and purified by flash chromatography on silica gel to produce **23** as a white powder (205 mg, 52.4 %). <sup>1</sup>H NMR (400 MHz, DMSO-*d*<sub>6</sub>)  $\delta$ : 8.38 (d, 1H, NH), 8.23 (m, 3H, NH and adenine H overlapping), 8.12 (m, 4H, NH and adenine H overlapping), 7.79 (d, 1H, ArH), 7.73 (m, 2H, ArH), 7.76 (s, 1H, ArH), 7.42 (m, 2H, ArH), 7.33 (d, 1H, ArH), 7.20 (m, 5H, ArH), 6.70, 6.42 (each br. s, 2H, NHCNH), 5.92 (d, 1H, H-1), 5.37 (t, 1H, H-4), 5.02 (t, 1H, H-3), 4.90 (t, 1H, H-2), 4.61 (m, 2H, CHCH<sub>2</sub>CO and CHCH<sub>2</sub>C overlapping), 4.49 (m, 1H, CHCH<sub>2</sub>C), 4.36 (d, 1H, H-5), 4.30 (m, 1H, CHCH<sub>2</sub>CH<sub>2</sub>), 4.20 (t, 2H, NHCH<sub>2</sub>CH<sub>2</sub>N), 3.73 (br. s, 2H, NHCH<sub>2</sub>CO), 3.41 (m, 2H, NHCH<sub>2</sub>CH<sub>2</sub>N), 3.03 (m, 4H, CHCH<sub>2</sub>C), 2.89 (m, 4H, CCH<sub>2</sub>C and CHCH<sub>2</sub>CO overlapping), 2.59 (m, 2H, CH<sub>2</sub>CH<sub>2</sub>NH), 2.47, 2.40, 1.84 (each s, each 3H, each CCH<sub>3</sub>), 2.05, 2.01, 1.99, 1.97 (each s, each 3H, each



COCH<sub>3</sub>), 1.67 (br. s, 1H, CNH), 1.53 (m, 4H, CCH<sub>2</sub>CH<sub>2</sub>), 1.37, 1.34 (each s, 15H, C(CH<sub>3</sub>)<sub>3</sub> and C(CH<sub>3</sub>)<sub>2</sub>). LCMS (ESI) (m/z): C<sub>72</sub>H<sub>90</sub>N<sub>14</sub>O<sub>20</sub>S, calcd 1502.62; found 1501.86 [M-1]<sup>-</sup>, 1503.81 [M+1]<sup>+</sup>.

**Synthesis of 24:** Compound **23** (205 mg, 0.14 mmol) was dissolved in 10 mL TFA/H<sub>2</sub>O (95: 5) and stirred at room temperature for 1 h. TFA was removed by air blowing, and diethyl ether was added. The precipitate formed was filtered off under reduced pressure to obtain a light yellow crude product **24** which was used directly for synthesis of **3**.

**Synthesis of 3:** The crude product **24** was suspended in a mixture of MeOH/Et<sub>3</sub>N/H<sub>2</sub>O (4:1:5, 14 mL) and stirred at room temperature for 2 h. The solution was concentrated under reduced pressure and the residue was purified by HPLC. Freeze-drying gave a white powder **3** (42.9 mg, 25.6 %). <sup>1</sup>H NMR (400 MHz, DMSO-*d*<sub>6</sub>) δ: 8.22 (m, 5H, NH and adenine H overlapping), 8.08 (m, 3H, NH and adenine H overlapping), 7.79 (m, 4H, ArH), 7.47 (m, 2H, ArH), 7.32 (d, 1H, ArH), 7.26 (m, 5H, ArH), 4.90 (s, 1H, H-1), 4.46 (m, 3H, CHCH<sub>2</sub>CO, H-2, and CHCH<sub>2</sub>C overlapping), 4.33 (m, 2H, CHCH<sub>2</sub>C and CHCH<sub>2</sub>CH<sub>2</sub>), 4.06 (d, 1H, H-5), 3.75 (m, 2H, NHCH<sub>2</sub>CO), 3.63 (m, 4H, NHCH<sub>2</sub>CH<sub>2</sub>N), 3.48 (t, 1H, H-4), 3.31 (m, 1H, H-3), 3.22 (m, 4H, OH), 3.09 (m, 4H, CHCH<sub>2</sub>C), 2.87 (m, 2H, CHCH<sub>2</sub>CO), 2.63 (m, 2H, CH<sub>2</sub>CH<sub>2</sub>NH), 1.76 (br. s, 1H, CNH), 1.52 (m, 4H, CCH<sub>2</sub>CH<sub>2</sub>). LCMS (ESI) (m/z): C<sub>47</sub>H<sub>58</sub>N<sub>14</sub>O<sub>13</sub>, calcd 1026.43; found 1025.33 [M-1]<sup>-</sup>, 1027.41 [M+1]<sup>+</sup>.

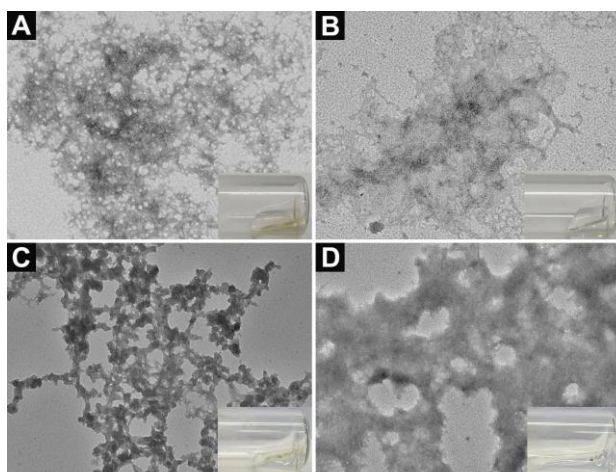

**Figure S1:** TEM images of solutions of (A) **1**, (B) **2**, (C) **5**, (D) **6**. All compounds were dissolved in DI water at the concentration of 3.0 wt% and pH 4.0. Inserts are the corresponding optical images. Scale bar = 100 nm.

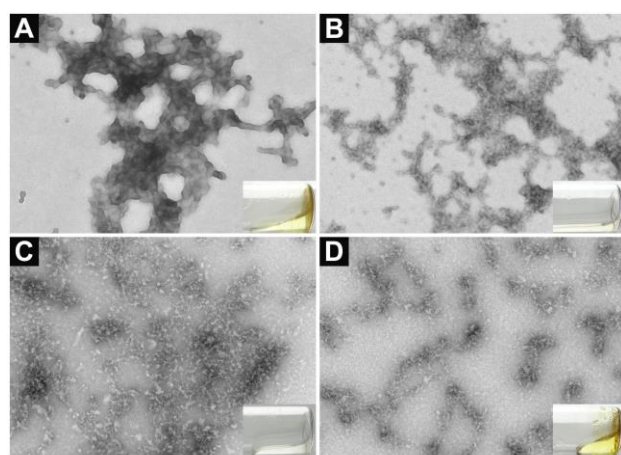

**Figure S2:** TEM images of solutions of (A) **3** (pH = 6.2, 3 wt %), (B) **4** (pH = 6.8, 3 wt %), (C) **7** (pH = 5.0, 3 wt %), (D) **8** (pH = 5.4, 3 wt %). Inserts are the corresponding optical images. Scale bar = 100 nm.

## References

1. Pandey, M. D.; Mishra, A. K.; Chandrasekhar, V.; Verma, S. *Inorg. Chem.*, **2010**, *49*, 2020-2022.
2. Elidrisi, I.; Negin, S.; Bhatt, P. V.; Govender, T.; Kruger, H. G.; Gokel, G. W.; Maguire, G. E. M. *Org. Biomol. Chem.*, **2011**, *9*, 4498-4506.
3. Das, B. K.; Shibata, N.; Takeuchi, Y. *J. Chem. Soc., Perkin Trans. 1*, **2002**, 197-206.
4. Tosin, M.; Murphy, P. V. *Org. Lett.*, **2002**, *4*, 3675-3678.
5. Cagnoni, A. J.; Varela, O.; Gouin, S. G.; Kovensky, J.; Uhrig, M. L. *J. Org. Chem.*, **2011**, *76*, 3064-3077.
6. Chan, W. C.; white, P. D. In *Fmoc Solid Phase Peptide Synthesis: A Practical Approach*; Oxford University Press Inc.: New York, 2000, p 41-73.
